# Supplementary material
Source: PubMed Central journal article supplement (PMC1544156)
Supplement: pnas_0602380103_1.pdf [file pnas_0602380103_1.pdf]

**Table 3.** Genotypes of eight *M. arvalis* females (M) and their 45 offspring (E) obtained at seven microsatellite loci.

| Locus        | CRB5       |            | CRB 7      |            | MAG25      |            | MM1       |           | MM2        |            | MM6        |            | MM8        |            |
|--------------|------------|------------|------------|------------|------------|------------|-----------|-----------|------------|------------|------------|------------|------------|------------|
|              | Allele 1   | Allele 2   | Allele 1   | Allele 2   | Allele 1   | Allele 2   | Allele 1  | Allele 2  | Allele 1   | Allele 2   | Allele 1   | Allele 2   | Allele 1   | Allele 2   |
| <b>CH1-M</b> | <b>134</b> | <b>142</b> | <b>100</b> | <b>102</b> | <b>170</b> | <b>174</b> | <b>68</b> | <b>82</b> | <b>189</b> | <b>195</b> | <b>149</b> | <b>161</b> | <b>183</b> | <b>183</b> |
| CH1-E1       | 132        | 142        | 100        | 100        | 174        | 174        | 68        | 68        | 193        | 195        | 149        | 165        | 179        | 183        |
| CH1-E2       | 142        | 142        | 100        | 100        | 174        | 188        | 68        | 68        | 189        | 193        | 149        | 165        | 183        | 189        |
| CH1-E3       | 134        | 142        | 100        | 102        | 170        | 174        | 68        | 82        | 185        | 189        | 149        | 165        | 183        | 183        |
| CH1-E4       | 132        | 134        | 100        | 100        | 174        | 174        | 68        | 82        | 189        | 189        | 149        | 161        | 183        | 189        |
| CH1-E5       | 142        | 174        | 100        | 100        | 174        | 174        | 68        | 82        | 189        | 193        | 149        | 161        | 183        | 189        |
| <b>CH2-M</b> | <b>132</b> | <b>150</b> | <b>100</b> | <b>100</b> | <b>160</b> | <b>188</b> | <b>76</b> | <b>82</b> | <b>183</b> | <b>185</b> | <b>147</b> | <b>153</b> | <b>183</b> | <b>189</b> |
| CH2-E1       | 132        | 132        | 100        | 100        | 186        | 188        | 68        | 82        | 183        | 185        | 149        | 153        | 187        | 189        |
| CH2-E2       | 132        | 150        | 100        | 100        | 176        | 188        | 74        | 82        | 183        | 185        | 149        | 153        | 175        | 189        |
| CH2-E3       | 132        | 132        | 100        | 100        | 186        | 188        | 68        | 76        | 183        | 189        | 147        | 153        | 183        | 189        |
| CH2-E4       | 132        | 150        | 100        | 101        | 160        | 176        | 74        | 76        | 185        | 185        | 149        | 153        | 183        | 189        |
| CH2-E5       | 150        | 170        | 100        | 100        | 170        | 188        | 68        | 82        | 185        | 189        | 147        | 149        | 181        | 183        |
| CH2-E6       | 132        | 150        | 100        | 101        | 160        | 186        | 68        | 76        | 185        | 189        | 147        | 153        | 187        | 189        |
| CH2-E7       | 132        | 134        | 100        | 101        | 160        | 186        | 68        | 76        | 185        | 189        | 147        | 153        | 183        | 189        |
| <b>CH3-M</b> | <b>132</b> | <b>142</b> | <b>101</b> | <b>101</b> | <b>162</b> | <b>162</b> | <b>68</b> | <b>68</b> | <b>163</b> | <b>193</b> | <b>155</b> | <b>171</b> | <b>183</b> | <b>185</b> |
| CH3-E1       | 132        | 132        | 101        | 101        | 162        | 186        | 68        | 76        | 193        | 203        | 155        | 157        | 183        | 183        |
| CH3-E2       | 132        | 132        | 101        | 101        | 154        | 162        | 68        | 74        | 163        | 193        | 155        | 171        | 183        | 185        |
| CH3-E3       | 132        | 168        | 101        | 101        | 162        | 178        | 68        | 80        | 193        | 199        | 153        | 155        | 183        | 183        |
| CH3-E4       | 132        | 132        | 99         | 101        | 162        | 182        | 68        | 74        | 193        | 193        | 153        | 171        | 183        | 185        |
| CH3-E5       | 132        | 132        | 99         | 101        | 162        | 182        | 68        | 76        | 163        | 203        | 155        | 163        | 183        | 183        |
| CH3-E6       | 132        | 142        | 101        | 101        | 162        | 186        | 68        | 74        | 163        | 193        | 155        | 163        | 183        | 185        |
| CH3-E7       | 142        | 142        | 101        | 101        | 162        | 186        | 68        | 76        | 193        | 203        | 155        | 171        | 183        | 185        |
| <b>G1-M</b>  | <b>132</b> | <b>136</b> | <b>98</b>  | <b>102</b> | <b>168</b> | <b>196</b> | <b>72</b> | <b>78</b> | <b>187</b> | <b>199</b> | <b>159</b> | <b>163</b> | <b>193</b> | <b>181</b> |
| G1-E1        | 136        | 136        | 98         | 103        | 168        | 168        | 70        | 72        | 185        | 199        | 159        | 163        | 181        | 187        |
| G1-E2        | 132        | 140        | 98         | 98         | 160        | 168        | 74        | 78        | 187        | 187        | 159        | 163        | 181        | 187        |
| G1-E3        | 132        | 136        | 102        | 102        | 168        | 196        | 70        | 72        | 187        | 187        | 159        | 163        | 175        | 181        |
| G1-E4        | 136        | 136        | 102        | 103        | 168        | 196        | 74        | 78        | 185        | 199        | 159        | 163        | 175        | 193        |
| G1-E5        | 136        | 140        | 98         | 98         | 160        | 168        | 74        | 78        | 199        | 199        | 159        | 163        | 175        | 181        |
| G1-E6        | 132        | 136        | 98         | 98         | 160        | 168        | 74        | 78        | 185        | 199        | 159        | 163        | 193        | 193        |
| <b>G2-M</b>  | <b>136</b> | <b>136</b> | <b>98</b>  | <b>99</b>  | <b>166</b> | <b>182</b> | <b>76</b> | <b>86</b> | <b>163</b> | <b>187</b> | <b>161</b> | <b>165</b> | <b>175</b> | <b>177</b> |
| G2-E1        | 136        | 136        | 99         | 101        | 182        | 182        | 80        | 86        | 187        | 199        | 161        | 165        | 177        | 187        |
| G2-E2        | 136        | 136        | 98         | 99         | 182        | 198        | 84        | 86        | 163        | 193        | 165        | 157        | 175        | 175        |
| G2-E3        | 136        | 136        | 98         | 101        | 166        | 166        | 76        | 80        | 163        | 199        | 161        | 165        | 175        | 187        |
| G2-E4        | 136        | 144        | 98         | 101        | 166        | 166        | 72        | 86        | 187        | 193        | 157        | 165        | 177        | 187        |
| G2-E5        | 136        | 136        | 98         | 98         | 182        | 198        | 70        | 86        | 163        | 185        | 161        | 161        | 173        | 175        |
| G2-E6        | 136        | 146        | 98         | 101        | 166        | 166        | 80        | 86        | 163        | 199        | 157        | 165        | 177        | 187        |
| G2-E7        | 136        | 136        | 98         | 98         | 166        | 166        | 82        | 86        | 163        | 193        | 157        | 165        | 177        | 185        |
| <b>G3-M</b>  | <b>136</b> | <b>152</b> | <b>98</b>  | <b>98</b>  | <b>154</b> | <b>182</b> | <b>74</b> | <b>76</b> | <b>?</b>   | <b>?</b>   | <b>157</b> | <b>163</b> | <b>181</b> | <b>185</b> |
| G3-E1        | 136        | 136        | 98         | 100        | 166        | 182        | 74        | 84        | 191        | 191        | 157        | 159        | 181        | 195        |
| G3-E2        | 132        | 136        | 98         | 100        | 182        | 182        | 76        | 76        | 195        | 197        | 157        | 165        | 181        | 185        |
| G3-E3        | 132        | 152        | 98         | 101        | 154        | 166        | 72        | 76        | 191        | 191        | 157        | 165        | 185        | 195        |
| G3-E4        | 132        | 136        | 98         | 100        | 154        | 166        | 74        | 84        | 191        | 197        | 157        | 159        | 185        | 185        |
| G3-E5        | 136        | 166        | 98         | 100        | 166        | 182        | 76        | 84        | 191        | 191        | 157        | 159        | 185        | 185        |
| G3-E6        | 132        | 152        | 98         | 100        | 166        | 182        | 74        | 76        | 191        | 191        | 159        | 163        | 185        | 195        |

| Locus       | CRB5       |            | CRB 7      |            | MAG25      |            | MM1       |           | MM2        |            | MM6        |            | MM8        |            |
|-------------|------------|------------|------------|------------|------------|------------|-----------|-----------|------------|------------|------------|------------|------------|------------|
| Sample      | Allele 1   | Allele 2   | Allele 1   | Allele 2   | Allele 1   | Allele 2   | Allele 1  | Allele 2  | Allele 1   | Allele 2   | Allele 1   | Allele 2   | Allele 1   | Allele 2   |
| <b>G4-M</b> | <b>158</b> | <b>168</b> | <b>98</b>  | <b>102</b> | <b>158</b> | <b>168</b> | <b>68</b> | <b>86</b> | <b>209</b> | <b>209</b> | <b>157</b> | <b>169</b> | <b>187</b> | <b>191</b> |
| G4-E1       | 158        | 168        | 98         | 103        | 158        | 168        | 68        | 80        | 185        | 209        | 159        | 169        | 175        | 187        |
| G4-E2       | 168        | 168        | 102        | 103        | 168        | 174        | 68        | 70        | 185        | 209        | 157        | 159        | 175        | 187        |
| G4-E3       | 168        | 168        | 98         | 103        | 168        | 168        | 80        | 86        | 209        | 209        | 159        | 169        | 187        | 187        |
| G4-E4       | 160        | 168        | 98         | 102        | 160        | 168        | 68        | 80        | 209        | 209        | 157        | 169        | 187        | 191        |
| <b>G5-M</b> | <b>152</b> | <b>160</b> | <b>102</b> | <b>103</b> | <b>160</b> | <b>164</b> | <b>76</b> | <b>82</b> | <b>197</b> | <b>197</b> | <b>161</b> | <b>163</b> | <b>185</b> | <b>187</b> |
| G5-E1       | 160        | 174        | 98         | 102        | 160        | 174        | 76        | 82        | 197        | 201        | 161        | 169        | 175        | 185        |
| G5-E2       | 160        | 180        | 101        | 103        | 160        | 178        | 76        | 76        | 197        | 201        | 161        | 169        | 175        | 187        |
| G5-E3       | 160        | 180        | 102        | 102        | 160        | 178        | 76        | 82        | 197        | 197        | 159        | 161        | 175        | 185        |

Loci where more than two paternal alleles were detected in a litter are shaded in grey. Sample names correspond to the place of capture: CH: Switzerland, individuals from three different populations; G: Germany, samples from one sampling site.
